# Supplementary material
Source: PubMed Central journal article supplement (PMC9590754)
Supplement: NIHMS1840383-supplement-Lakshmanan_et_al__Supplement.pdf [file NIHMS1840383-supplement-Lakshmanan_et_al__Supplement.pdf]

## Supporting information

### **Revised model of the tissue factor pathway of thrombin generation: role of the feedback activation of FXI**

Hari Hara Sudhan Lakshmanan<sup>1#</sup>, Aldrich Estonilo<sup>2</sup>, Stephanie E. Reitsma<sup>1</sup>, Alexander R. Melrose<sup>1</sup>, Jayaram Subramanian<sup>3</sup>, Tony J. Zheng<sup>1</sup>, Jeevan Maddala<sup>4</sup>, Erik I. Tucker<sup>1,5</sup>, David Gailani<sup>6</sup>, Owen J.T. McCarty<sup>1</sup>, Patrick L. Journey<sup>2\*</sup> and Cristina Puy<sup>1\*</sup>

<sup>1</sup>*Department of Biomedical Engineering, Oregon Health & Science University, Oregon, USA;*

<sup>2</sup>*Department of Biomedical Engineering, San José State University, California, USA;* <sup>3</sup>*Enginuity Power Systems, Virginia, USA;* <sup>4</sup>*Department of Chemical and Biomedical Engineering, West Virginia University, West Virginia, USA;* <sup>5</sup>*Aronora, Inc., Portland, Oregon, USA;* <sup>6</sup>*Department of Pathology, Microbiology and Immunology, Vanderbilt University, Nashville, USA.*

\*Patrick L. Journey and Cristina Puy are co-senior authors

#### **Correspondence:**

Hari Hara Sudhan Lakshmanan  
Department of Biomedical Engineering  
Oregon Health and Science University  
3303 SW Bond Ave.  
Portland, OR 97239  
E-mail: lakshmah@ohsu.edu

**Table S1. Average initial plasma concentrations of enzymes and inhibitors**

| <b>Species</b>        | <b>Initial concentration (nM)</b> |
|-----------------------|-----------------------------------|
| TF                    | Varied                            |
| FVII                  | 10                                |
| TF-FVII               | 0                                 |
| FVIIa                 | 0.1                               |
| TF-FVIIa              | 0                                 |
| FXa                   | 0                                 |
| FIIa (thrombin)       | 0                                 |
| FX                    | 160                               |
| TF-FVIIa-FX           | 0                                 |
| TF-FVIIa-FXa          | 0                                 |
| FIX                   | 90                                |
| TF-FVIIa-FIX          | 0                                 |
| FIXa                  | 0                                 |
| FII (prothrombin)     | 1400                              |
| FVIII                 | 0.7                               |
| FVIIIa                | 0                                 |
| FIXa-FVIIIa           | 0                                 |
| FIXa-FVIIIa-FX        | 0                                 |
| FVIIIa <sub>1</sub>   | 0                                 |
| FVIIIa <sub>2</sub>   | 0                                 |
| FV                    | 20                                |
| FVa                   | 0                                 |
| FXa-FVa               | 0                                 |
| FXa-FVa-FII           | 0                                 |
| mFIIa (meizothrombin) | 0                                 |
| TFPI                  | 2.5                               |
| FXa-TFPI              | 0                                 |
| FVIIa-TF-FXa-TFPI     | 0                                 |
| ATIII                 | 3400                              |
| FXa-ATIII             | 0                                 |
| mFIIa-ATIII           | 0                                 |
| FIXa-ATIII            | 0                                 |
| FIIa-ATIII            | 0                                 |
| TF-FVIIa-ATIII        | 0                                 |
| FXI                   | 30                                |
| FXI-FIIa              | 0                                 |
| FXIa                  | 0                                 |
| FXIa-FIX              | 0                                 |

**Table S1.** (continued)

| <b>Species</b> | <b>Initial concentration (nM)</b> |
|----------------|-----------------------------------|
| C1-INH         | 2500                              |
| FXIa-C1-INH    | 0                                 |
| FXIa-ATIII     | 0                                 |
| FIXa-FX        | 0                                 |

FII – prothrombin, TF- Tissue factor, FV – coagulation factor V, FVII – coagulation factor VII, FVIII – coagulation factor VIII, FIX – coagulation factor IX, FX – coagulation factor X, FXI – coagulation factor XI, ATIII – antithrombin, TFPI – tissue factor pathway inhibitor, C1-INH – C1 inhibitor, FVIII<sub>1</sub> and FVIII<sub>2</sub> – trimeric forms of FVIIIa, mFIIa –meizothrombin. The activated forms of the coagulation factor are represented with ‘a’ added as the suffix, such as FIIa, FVIIa, FVIIIa, FIXa, FXa and FVa.

**Table S2. Reactions and kinetic constants of the extended Hockin-Mann model**

| No. | Reactions                                        | Kinetic constant     | Units          |
|-----|--------------------------------------------------|----------------------|----------------|
| 1   | $TF + FVII = TF-FVII$                            | $1.7 \times 10^5$    | $M^{-1}s^{-1}$ |
| 2   | $TF-FVII = TF + FVII$                            | $3.0 \times 10^{-3}$ | $s^{-1}$       |
| 3   | $TF + FVIIa = TF-FVIIa$                          | $2.2 \times 10^8$    | $M^{-1}s^{-1}$ |
| 4   | $TF-FVIIa = TF + FVIIa$                          | $3.1 \times 10^{-5}$ | $s^{-1}$       |
| 5   | $TF-FVIIa + FVII = TF-FVIIa + FVIIa$             | $4.4 \times 10^5$    | $M^{-1}s^{-1}$ |
| 6*  | $TF-FVIIa + TF-FVII = TF-FVIIa + TF-FVIIa$       | $4.4 \times 10^5$    | $M^{-1}s^{-1}$ |
| 7   | $FXa + FVII = FXa + FVIIa$                       | $2.5 \times 10^9$    | $M^{-1}s^{-1}$ |
| 8*  | $FXa + TF-FVII = FXa + TF-FVIIa$                 | $2.5 \times 10^9$    | $M^{-1}s^{-1}$ |
| 9   | $FIIa + FVII = FIIa + FVIIa$                     | $2.3 \times 10^4$    | $M^{-1}s^{-1}$ |
| 10* | $FIIa + TF-FVII = FIIa + TF-FVIIa$               | $2.3 \times 10^4$    | $M^{-1}s^{-1}$ |
| 11  | $TF-FVIIa + FX = TF-FVIIa-FX$                    | $7.5 \times 10^6$    | $M^{-1}s^{-1}$ |
| 12  | $TF-FVIIa-FX = TF-FVIIa + FX$                    | $5.2 \times 10^{-1}$ | $s^{-1}$       |
| 13  | $TF-FVIIa-FX = TF-FVIIa-FXa$                     | $1.1 \times 10^1$    | $s^{-1}$       |
| 14  | $TF-FVIIa + FXa = TF-FVIIa-FXa$                  | $2.2 \times 10^7$    | $M^{-1}s^{-1}$ |
| 15  | $TF-FVIIa-FXa = TF-FVIIa + FXa$                  | $3.9 \times 10^1$    | $s^{-1}$       |
| 16  | $TF-FVIIa + IX = TF-FVIIa-IX$                    | $2.7 \times 10^7$    | $M^{-1}s^{-1}$ |
| 17  | $TF-FVIIa-IX = TF-FVIIa + IX$                    | $4.2 \times 10^2$    | $s^{-1}$       |
| 18  | $TF-FVIIa-IX = TF-FVIIa + FIXa$                  | $1 \times 10^1$      | $s^{-1}$       |
| 19  | $FII + FXa = FIIa + FXa$                         | $9.2 \times 10^3$    | $M^{-1}s^{-1}$ |
| 20  | $FIIa + FVIII = FIIa + FVIIIa$                   | $2.5 \times 10^7$    | $M^{-1}s^{-1}$ |
| 21  | $FVIIIa + FIXa = FIXa-FVIIIa$                    | $5 \times 10^7$      | $M^{-1}s^{-1}$ |
| 22  | $FIXa-FVIIIa = FVIIIa + FIXa$                    | $2.8 \times 10^{-3}$ | $M^{-1}s^{-1}$ |
| 23  | $FIXa-FVIIIa + X = FIXa-FVIIIa-FX$               | $1.3 \times 10^8$    | $M^{-1}s^{-1}$ |
| 24  | $FIXa-FVIIIa-X = FIXa-FVIIIa + X$                | $1.0 \times 10^{-3}$ | $s^{-1}$       |
| 25  | $FIXa-FVIIIa-X = FIXa-FVIIIa + FXa$              | $4.2 \times 10^1$    | $s^{-1}$       |
| 26  | $FVIIIa = FVIIIa1 + FVIIIa2$                     | $7.5 \times 10^{-3}$ | $s^{-1}$       |
| 27  | $FVIIIa1 + FVIIIa2 = FVIIIa$                     | $2.1 \times 10^4$    | $M^{-1}s^{-1}$ |
| 28  | $FIXa-FVIIIa-FX = FVIIIa1 + FVIIIa2 + FX + FIXa$ | $1.4 \times 10^{-4}$ | $s^{-1}$       |
| 29  | $FIXa-FVIIIa = FVIIIa1 + FVIIIa2 + FIXa$         | $6.1 \times 10^{-4}$ | $s^{-1}$       |
| 30  | $FIIa + FV = FIIa + FVa$                         | $2.3 \times 10^7$    | $M^{-1}s^{-1}$ |
| 31  | $FXa + FVa = FXa-FVa$                            | $4.9 \times 10^8$    | $M^{-1}s^{-1}$ |
| 32  | $FXa-FVa = FXa + FVa$                            | $3 \times 10^{-1}$   | $s^{-1}$       |
| 33  | $FXa-FVa + FII = FXa-FVa-FII$                    | $2.5 \times 10^7$    | $M^{-1}s^{-1}$ |
| 34  | $FXa-FVa-FII = FXa-FVa + FII$                    | $7.8 \times 10^1$    | $s^{-1}$       |
| 35  | $FXa-FVa-FII = FXa-FVa + mFIIa$                  | $1.3 \times 10^1$    | $s^{-1}$       |
| 36  | $FXa-FVa + mFIIa = FXa-FVa + FIIa$               | $2.3 \times 10^7$    | $s^{-1}$       |
| 37  | $FXa + TFPI = FXa-TFPI$                          | $2.2 \times 10^7$    | $M^{-1}s^{-1}$ |
| 38  | $FXa-TFPI = FXa + TFPI$                          | $3.7 \times 10^{-5}$ | $s^{-1}$       |

**Table S2.** (continued)

| No. | Reactions                                                      | Kinetic constant     | Units                        |
|-----|----------------------------------------------------------------|----------------------|------------------------------|
| 39  | $\text{TF-FVIIa-FXa} + \text{TFPI} = \text{TF-FVIIa-FXa-TFPI}$ | $1 \times 10^7$      | $\text{M}^{-1}\text{s}^{-1}$ |
| 40  | $\text{TF-FVIIa-FXa-TFPI} = \text{TF-FVIIa-FXa} + \text{TFPI}$ | $1 \times 10^{-5}$   | $\text{s}^{-1}$              |
| 41  | $\text{TF-FVIIa} + \text{FXa-TFPI} = \text{TF-FVIIa-FXa-TFPI}$ | $4.4 \times 10^8$    | $\text{M}^{-1}\text{s}^{-1}$ |
| 42  | $\text{FXa} + \text{ATIII} = \text{FXa-ATIII}$                 | $1.2 \times 10^3$    | $\text{M}^{-1}\text{s}^{-1}$ |
| 43  | $\text{mFIIa} + \text{ATIII} = \text{mFIIa-ATIII}$             | $1 \times 10^4$      | $\text{M}^{-1}\text{s}^{-1}$ |
| 44  | $\text{FIXa} + \text{ATIII} = \text{FIXa-ATIII}$               | $7 \times 10^2$      | $\text{M}^{-1}\text{s}^{-1}$ |
| 45  | $\text{FIIa} + \text{ATIII} = \text{FIIa-ATIII}$               | $2.1 \times 10^3$    | $\text{M}^{-1}\text{s}^{-1}$ |
| 46  | $\text{TF-FVIIa} + \text{ATIII} = \text{TF-FVIIa-ATIII}$       | $3.3 \times 10^2$    | $\text{M}^{-1}\text{s}^{-1}$ |
| 47* | $\text{FXI} + \text{FIIa} = \text{FXI-FIIa}$                   | $5 \times 10^7$      | $\text{M}^{-1}\text{s}^{-1}$ |
| 48* | $\text{FXI-FIIa} = \text{XI} + \text{FIIa}$                    | 9.9                  | $\text{s}^{-1}$              |
| 49* | $\text{FXI-FIIa} = \text{FXIa} + \text{FIIa}$                  | $1.1 \times 10^{-4}$ | $\text{s}^{-1}$              |
| 50* | $\text{FXIa} + \text{FIX} = \text{FXIa-FIX}$                   | $6.1 \times 10^5$    | $\text{M}^{-1}\text{s}^{-1}$ |
| 51* | $\text{FXIa-IX} = \text{FXIa} + \text{IX}$                     | $9.9 \times 10^{-1}$ | $\text{s}^{-1}$              |
| 52* | $\text{FXIa-IX} = \text{FXIa} + \text{FIXa}$                   | $1.1 \times 10^{-1}$ | $\text{s}^{-1}$              |
| 53* | $\text{FXIa} + \text{ATIII} = \text{FXIa-ATIII}$               | $3.2 \times 10^2$    | $\text{M}^{-1}\text{s}^{-1}$ |
| 54* | $\text{FXIa} + \text{C1-INH} = \text{FXIa-C1-INH}$             | $1.8 \times 10^3$    | $\text{M}^{-1}\text{s}^{-1}$ |
| 55* | $\text{FIXa} + \text{FX} = \text{FIXa-FX}$                     | $1 \times 10^8$      | $\text{M}^{-1}\text{s}^{-1}$ |
| 56* | $\text{FIXa-FX} = \text{FIXa} + \text{FX}$                     | $3.3 \times 10^2$    | $\text{s}^{-1}$              |
| 57* | $\text{FIXa-FX} = \text{FIXa} + \text{FXa}$                    | $3 \times 10^{-3}$   | $\text{s}^{-1}$              |

Asterisk (\*) denotes reactions that are newly added to the HM model in this study.

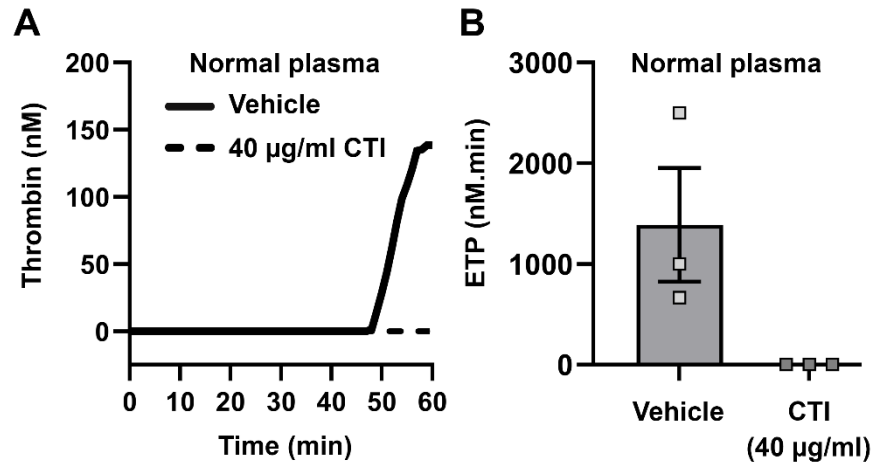

**Fig S1: Validating the experimental concentration of CTI used in thrombin generation in plasma.** (A) Thrombin generation in normal plasma supplemented with vehicle or 40 µg/ml CTI was initiated by adding CaCl<sub>2</sub>. (B) ETP was estimated from the thrombin generation curves for each condition. Data are means ± SE (n = 3).

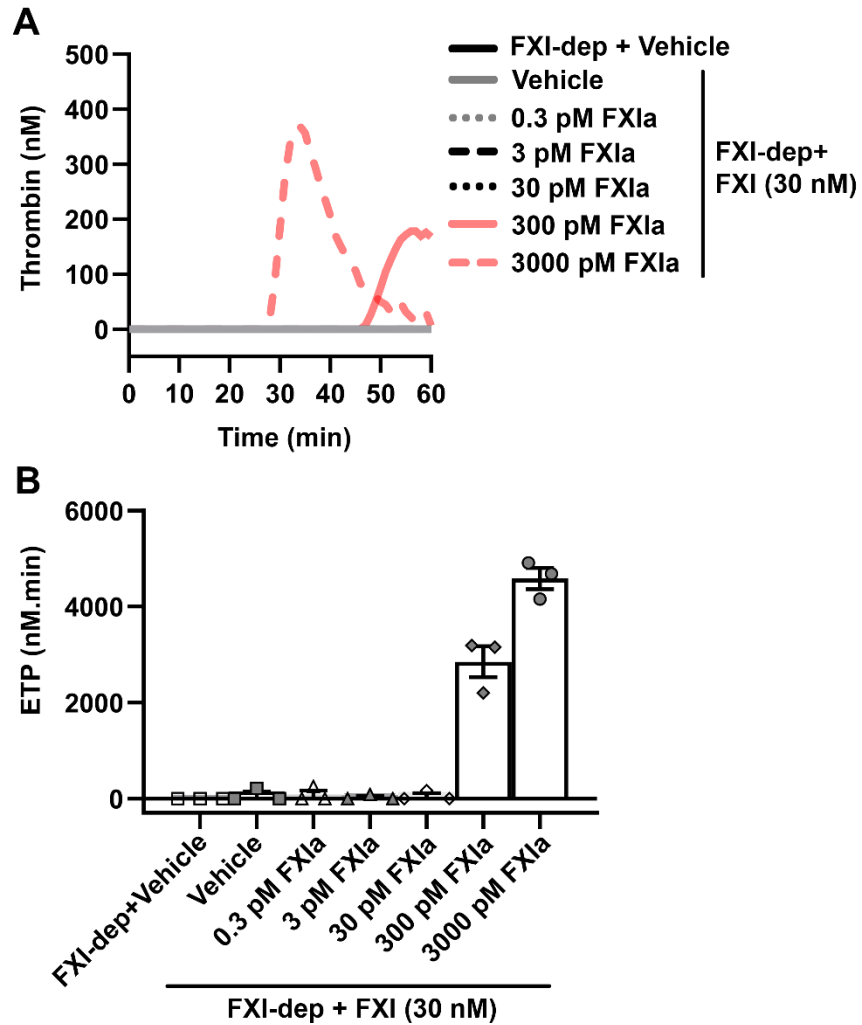

**Fig S2: Effect of FXIa on thrombin generation in FXI-depleted plasma supplemented with FXI.** (A) FXI-depleted plasma (FXI-dep) supplemented with 30 nM FXI or vehicle was incubated with increasing concentrations of FXIa (0-3000 pM) for 30 min. Thrombin generation was initiated by adding CaCl<sub>2</sub>. (B) ETP for each condition was estimated from the thrombin generation curves. Data are means  $\pm$  SE (n = 3).

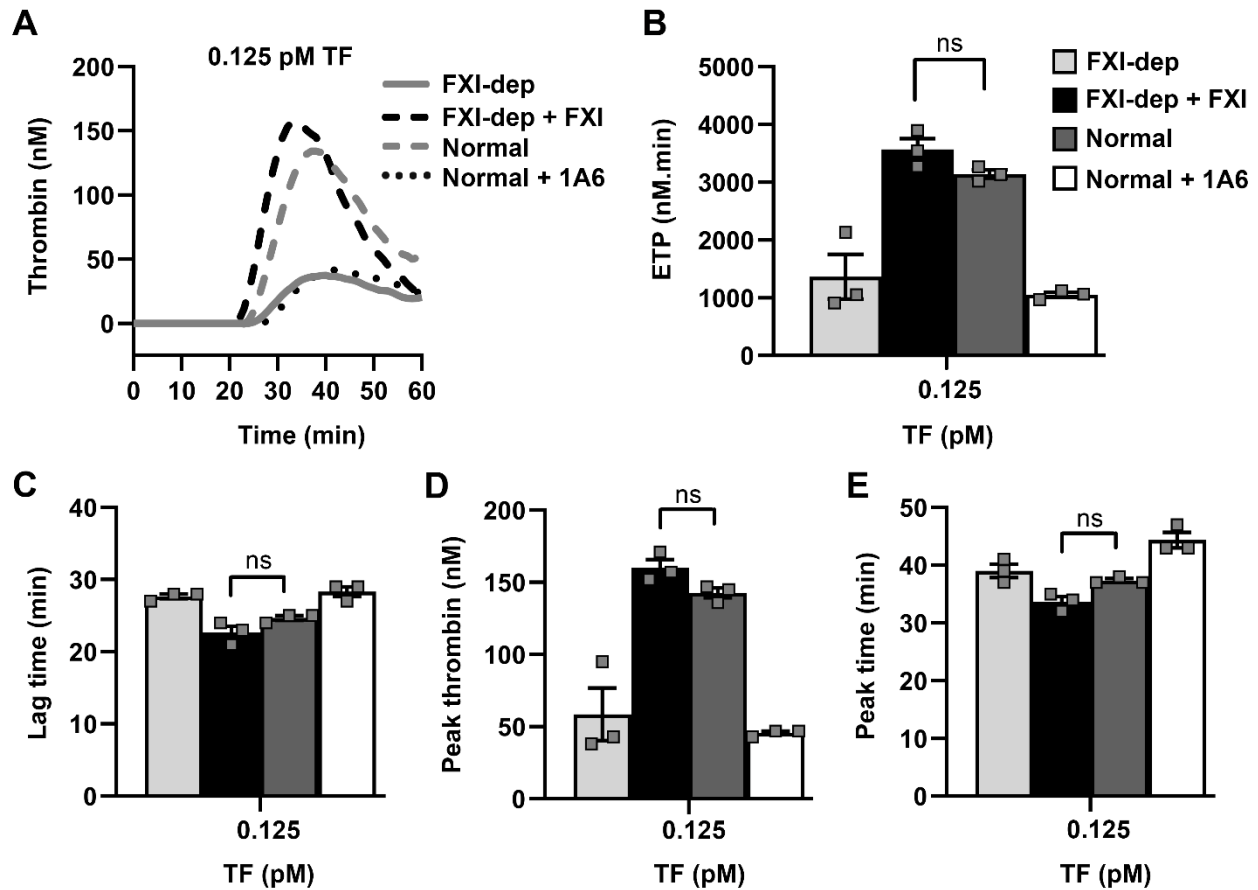

**Fig S3: Comparison of TF-initiated thrombin generation in normal plasma with FXI-depleted plasma supplemented with FXI.** (A) Thrombin generation in normal or FXI-depleted plasma (FXI-dep) supplemented with 30 nM FXI or vehicle was initiated by the addition of TF (0.125 pM) and CaCl<sub>2</sub>. Normal plasma was supplemented with either vehicle or anti-FXI mAb, 1A6 (30 μg/ml). (B) ETP, (C) Lag time, (D) Peak thrombin and (E) Peak time were estimated from the thrombin generation curves for each condition in normal and FXI-dep plasma. Data are means ± SE (n = 3). ns – not significant.



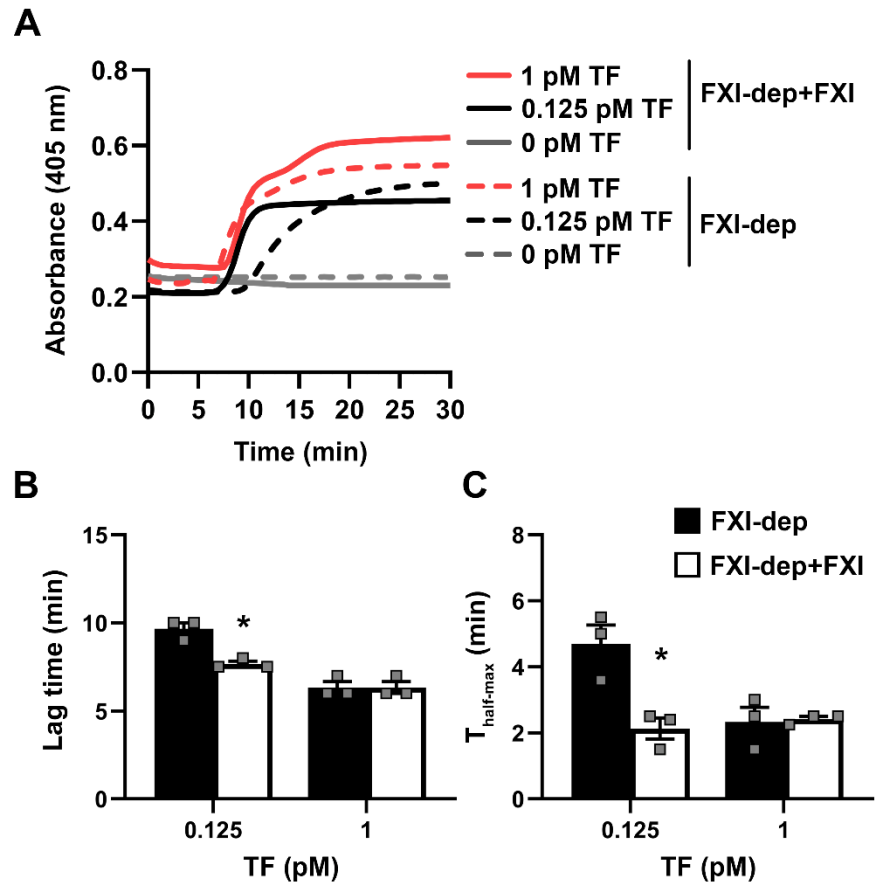

**Fig S4: Effect of FXI on TF-initiated fibrin generation in FXI-depleted plasma.** (A) FXI-depleted plasma (FXI-dep) was supplemented with 30 nM FXI or vehicle and fibrin generation was initiated by adding TF (0, 0.125 or 1 pM) and CaCl<sub>2</sub>. Fibrin generation was measured through recording changes in absorbance at 405 nm due to change in turbidity of the plasma (B) Lag time – time to initiate fibrin generation and (C)  $T_{\text{half-max}}$  – time to reach half-maximal fibrin generation were determined from the fibrin generation curves for each condition. Data are means  $\pm$  SE (n = 3). \* P < 0.05 with respect to FXI-dep.

#### Supporting methods:

FXI-depleted plasma was incubated with vehicle or 30 nM FXI for 30 min and treated with 40  $\mu\text{g/ml}$  CTI. Post-incubation period the plasma (40  $\mu\text{l}$ ) is pipetted into a 96-well polystyrene plate and fibrin formation was initiated by adding 60  $\mu\text{l}$  CaCl<sub>2</sub> (15mM) for all the experiments. TF (0.125 or 1 pM) was added in combination with CaCl<sub>2</sub> for select experiments. Fibrin generation was measured by monitoring turbidity at 405 nm every 30 seconds for 30 min using an Infinite M200 plate reader (TECAN, Switzerland). The time required to initiate fibrin formation as measured by the rapid change in absorbance is measured as the lag time and the time required for the turbidity of the solution to reach the half-maximal value was defined as  $T_{\text{half-max}}$ .

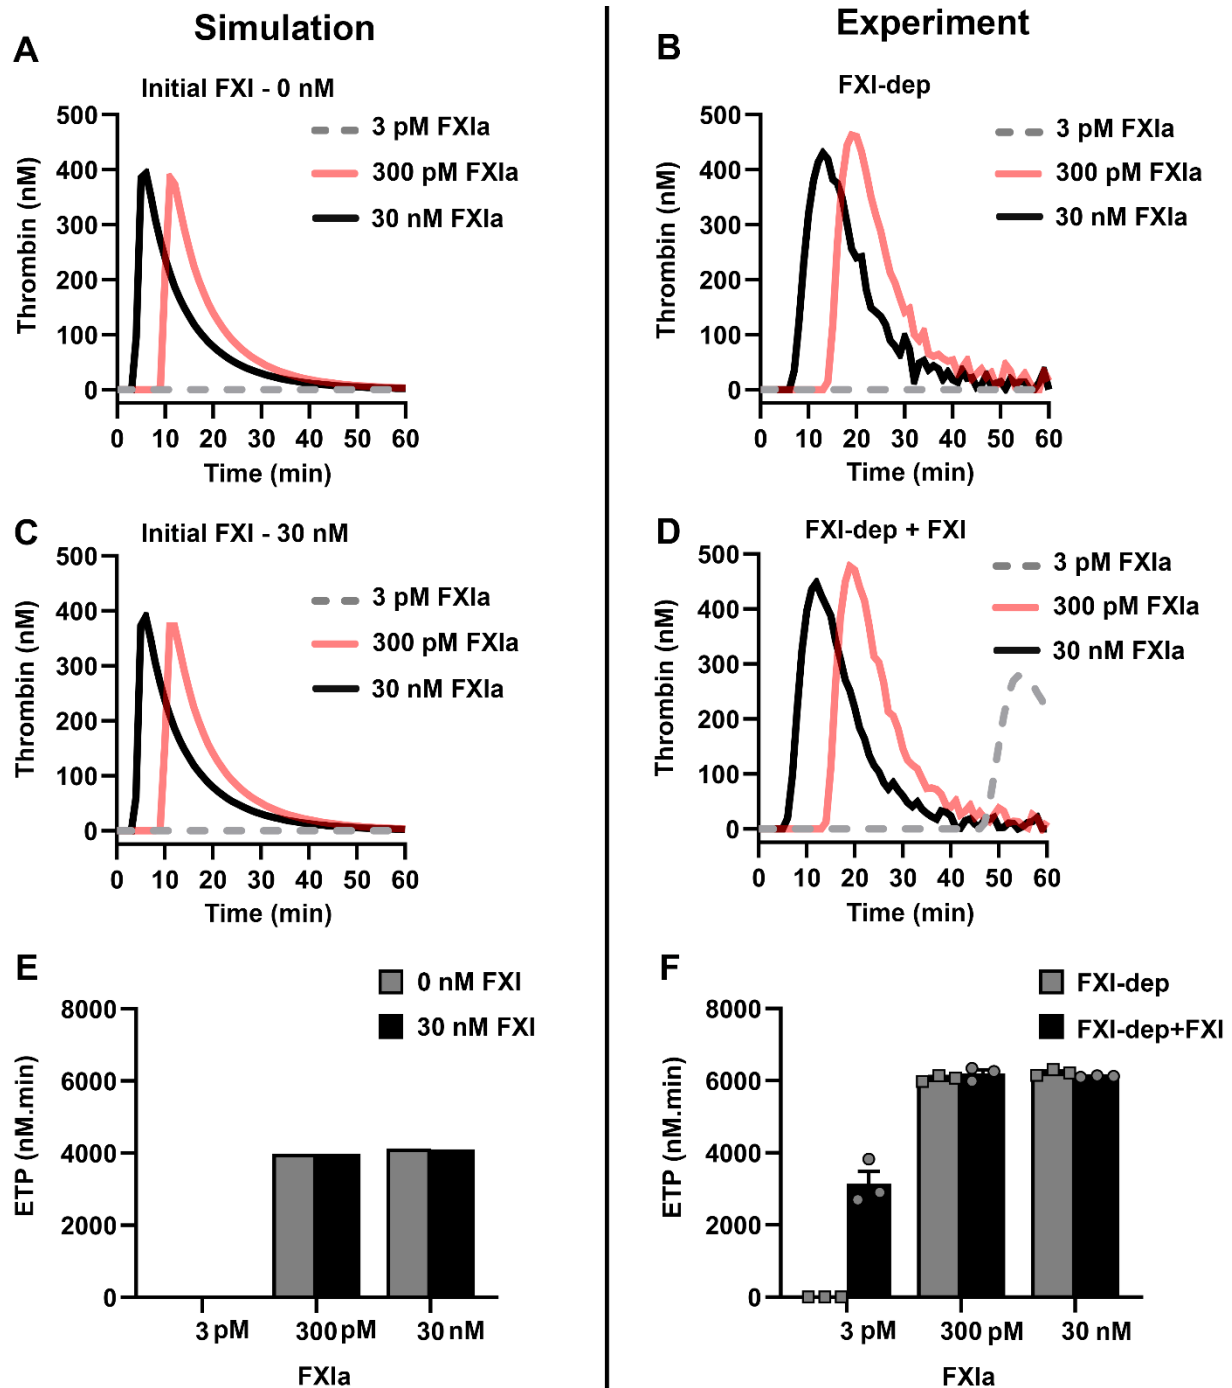

**Fig S5: Comparison of *in silico* and *in vitro* FXIa-initiated thrombin generation in FXI-depleted plasma.** Thrombin generation in plasma was simulated using the extended (ext.) Hockin-Mann (HM) model with the physiological concentrations of enzymes as described in methods, with 3 pM, 300 pM, or 30 nM FXIa and (A) 0 nM FXI or (C) 30 nM FXI. Thrombin generation in FXI-depleted plasma supplemented with (B) vehicle or (D) 30 nM FXI was initiated by adding 3 pM, 300 pM or 30 nM FXIa with CaCl<sub>2</sub>. ETP estimated from the (E) simulations and (F) the experiments for each condition respectively. Experimental data are shown as means  $\pm$  SE (n = 3).

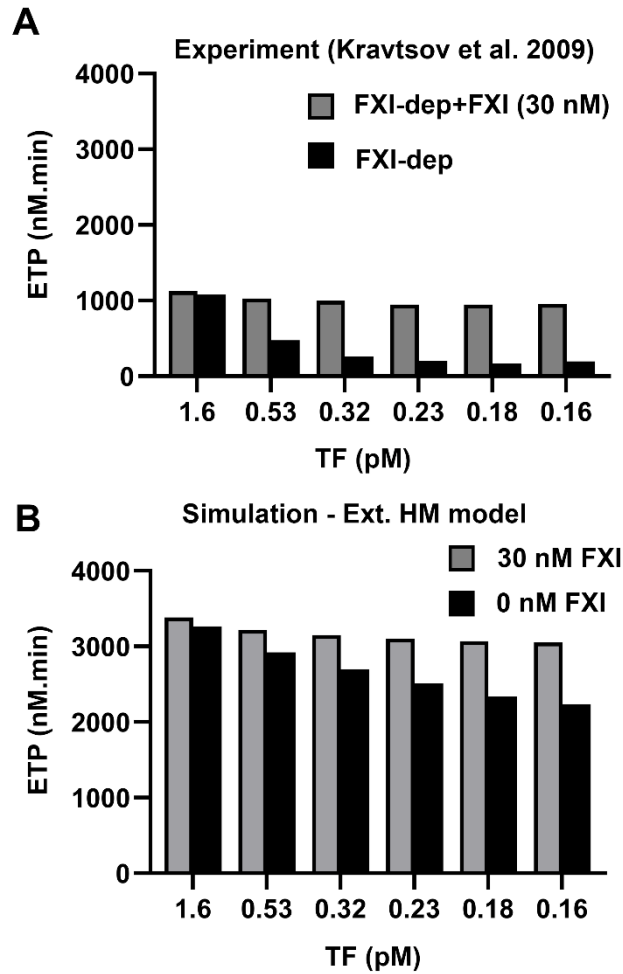

**Fig S6: Comparison of ETP from TF-initiated thrombin generation from Kravtsov et al. (2009) with the ETP predicted using the ext. HM model. (A) ETP data from the TF-initiated thrombin generation experiments in FXI-deficient plasma in the presence or absence of 30 nM FXI as reported by Kravtsov et al. in Blood (2009), (B) ETP from simulations of thrombin generation using the ext.HM model. Simulations were initiated with physiological concentrations of enzymes and 30 or 0 nM FXI for select TF concentrations (1.6 - 0.16 pM).**
